# Supplementary material for: Structural basis for the inhibition of Mycobacterium tuberculosis l,d-transpeptidase by meropenem, a drug effective against extensively drug-resistant strains
Source: PubMed Central journal article supplement (PMC3605043; doi:10.1107/s0907444912048998), 2013-02-16
Supplement: d-69-00420-sup1.pdf [file d-69-00420-sup1.pdf]

## Supplementary Information for

### Structural basis for the inhibition of *Mycobacterium tuberculosis* L,D-transpeptidase by meropenem, a drug effective against extensively drug-resistant strains

Hyoun Sook Kim<sup>a,b</sup>, Jieun Kim<sup>c</sup>, Ha Na Im<sup>c</sup>, Ji Young Yoon<sup>a</sup>, Doo Ri An<sup>c</sup>, Hye Jin Yoon<sup>a</sup>, Jin Young Kim<sup>d</sup>, Hye Kyeong Min<sup>d</sup>, Soon-Jong Kim<sup>e</sup>, Jae Young Lee<sup>f</sup>, Byung Woo Han<sup>b</sup>, and Se Won Suh<sup>a,c,\*</sup>

<sup>a</sup>Department of Chemistry, College of Natural Sciences, Seoul National University, Seoul 151-742, Korea, <sup>b</sup>Research Institute of Pharmaceutical Sciences, College of Pharmacy, Seoul National University, Seoul 151-742, Korea, <sup>c</sup>Department of Biophysics and Chemical Biology, College of Natural Sciences, Seoul National University, Seoul 151-742, Korea, <sup>d</sup>Division of Mass Spectrometry, Korea Basic Science Institute, Ochang-eup Yeongudangiro 162, Cheongwon-gun, Chungbuk 363-883, Korea, <sup>e</sup>Department of Chemistry, Mokpo National University, Chonnam 534-729, Korea, <sup>f</sup>Department of Life Science, Dongguk University-Seoul, Seoul 100-712, Korea

\*Corresponding author: S.W.S. (e-mail address: sewonsuh@snu.ac.kr)

**Supplementary Figures**

**Supplementary Tables**

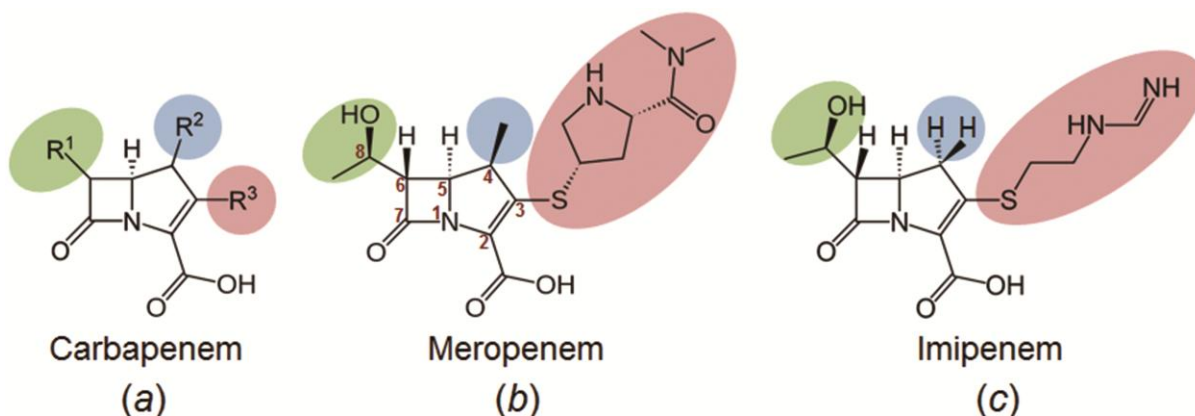

### Supplementary Figure S1

Chemical structures of carbapenems. (a–c) Variable regions (R<sup>1</sup>, R<sup>2</sup>, and R<sup>3</sup>) of carbapenem (a), meropenem (b), and imipenem (c) are shadowed by green, blue, and red, respectively.

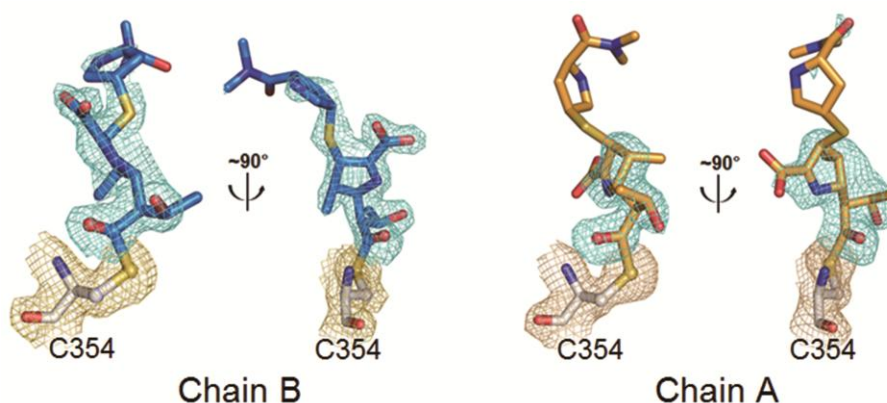

### Supplementary Figure S2

Electron density maps of meropenem bound to Ldt<sub>Mt2Δ130</sub>. Electron density maps of the meropenem adduct covalently bound to Cys354 in chains B and A of the meropenem-complexed Ldt<sub>Mt2Δ130</sub>. The omit  $mF_o - DF_c$  maps (contoured at  $2.5\sigma$ ) for the meropenem adduct and the  $2mF_o - DF_c$  maps (contoured at  $1.0\sigma$ ) for Cys354 are colored in blue and yellow, respectively, with their stick models.

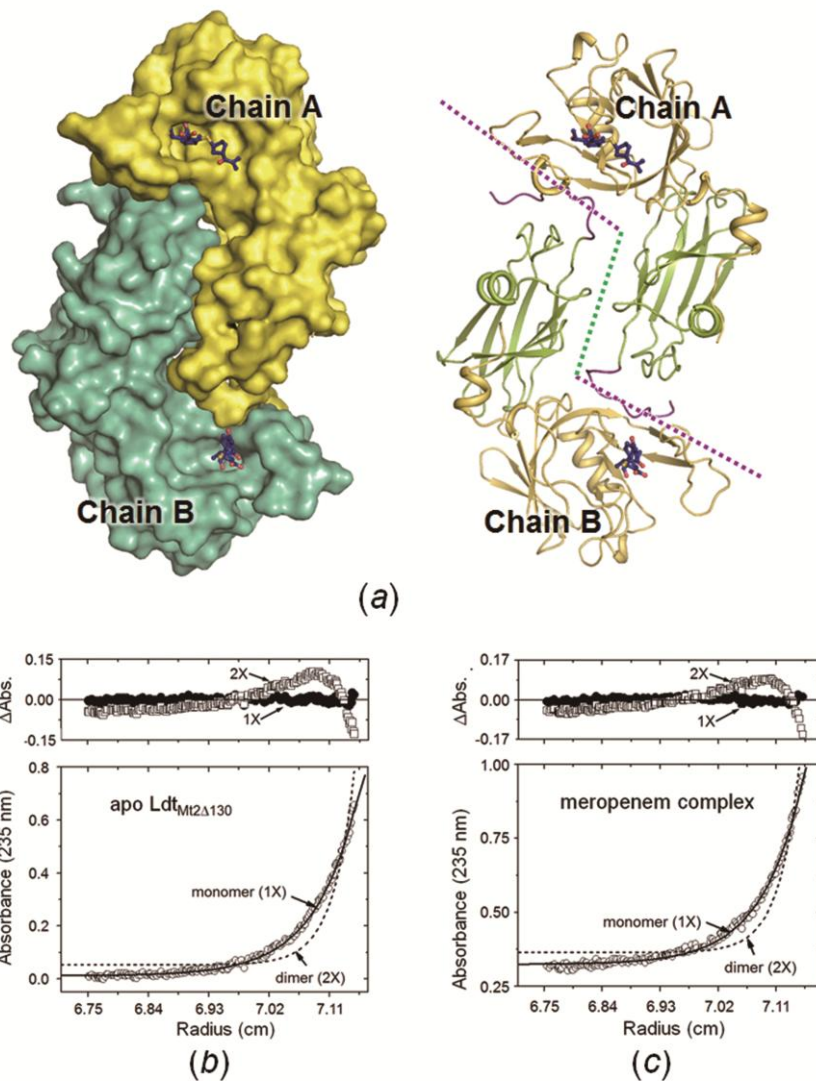

### Supplementary Figure S3

Analysis of the oligomeric state of  $Ldt_{M12\Delta130}$ . (a) Surface representation and ribbon diagram of two independent monomers of  $Ldt_{M12\Delta130}$  in the crystal structure of the meropenem-complex, showing a tight interaction between them. (b,c) Analytical ultracentrifugation data for apo (b) and meropenem-complexed  $Ldt_{M12\Delta130}$  (c). These representative data were measured at 235 nm and 24,000 rpm using 1.60  $\mu\text{M}$  protein for both samples. The circles are experimental data and the solid line is a fitting line for an ideal monomer (1x) model. The dotted lines are fitting lines for an ideal dimer (2x) model. Distributions of the residuals for monomer (1x, filled circles) and dimer (2x, square) models are shown in the top panels. Based on the UV spectrum of meropenem-complexed  $Ldt_{M12\Delta130}$  recorded with XL-A optics, sedimentation data were measured at 235 nm where the effect of meropenem absorption was minimal. Random distributions of the residuals for the monomer (1x) model indicate that

both apo and meropenem-complexed  $\text{Ldt}_{\text{M}2\Delta 130}$  exist as homogeneous monomers in solution.

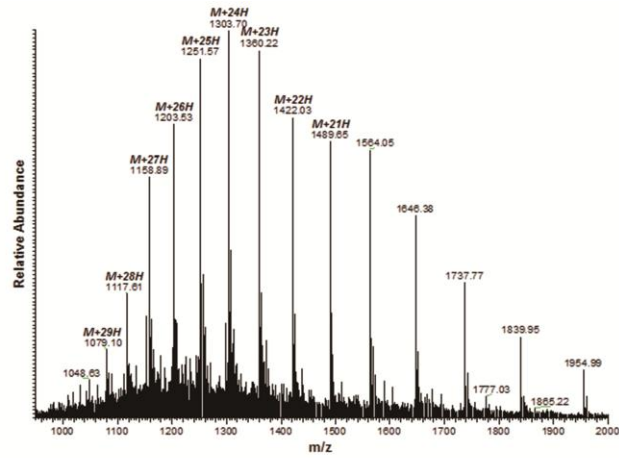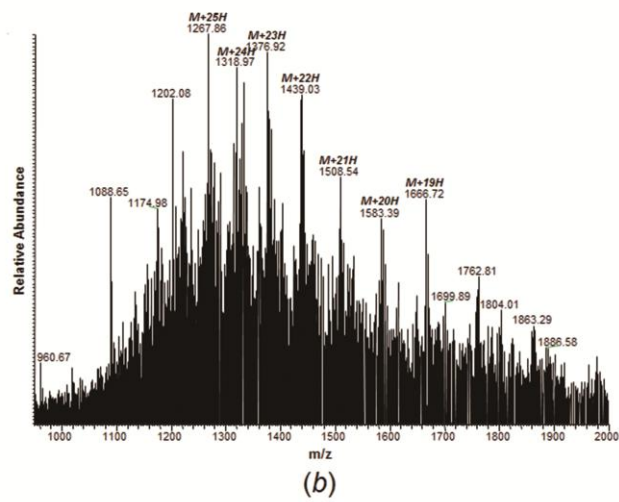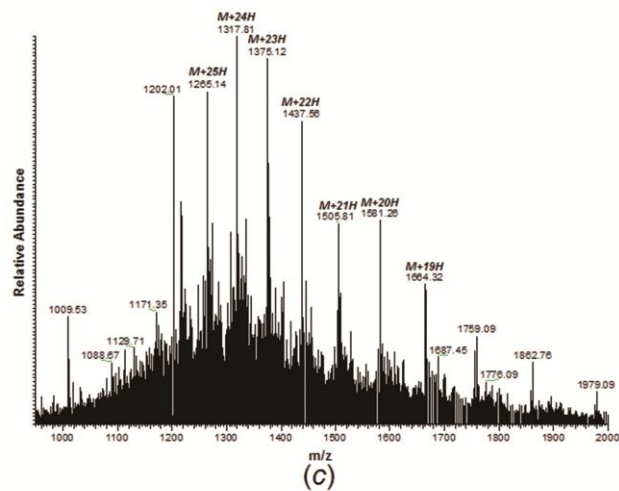

### Supplementary Figure S4

Mass spectrometry of  $\text{Ldt}_{\text{M}2\Delta 130}$ . (a–c) Mass spectra of  $\text{Ldt}_{\text{M}2\Delta 130}$  in the absence of meropenem (a), after 20 min incubation with meropenem (100-fold molar excess) (b), and

after three days of incubation with meropenem (*c*) were recorded using a linear ion trap mass spectrometer.

```
Ldt_mt2 259 : DNTKILTVRVNGEVVKSMP TSMGKDSTPTANGIYIVGSRYK : 299
Ldt_mt1 131 : ISAHTFTVSRNGEVLRTMPASL GKPSRPTPIGSEFHAMSKER : 171
Ldt_fm 349 : LENQHMWYYKDGKVALETDIVS GKPTTPTPAGVFYVWNKEE : 389
Ldt_bs 65 : IGAKTLLTSLNLRVMKTYPIAVGKILTQTPTGEFYIINRQR : 105
```

```

Active site lid
Ldt_mt2 300 : HIIMDSSTYGVPVNSPNGYRTD VDWATQISYSGV FVHSAPW : 340
Ldt_mt1 172 : TVVMDSRTIGIPLNSSDGYLLTAHYAVRV TWSGVYVHSAPW : 212
Ldt_fm 390 : DATLKGTND DG . . . . . TPYESFVNYWMPIDWTG VGIHDS DW : 425
Ldt_bs 106 : NPGG . . . . . PFGAYWLSLSKQHYGIHGTNN : 130
      .
      .
      .
Catalytic triad
Ldt_mt2 341 : SVGAQGH T N T . . . . . SHGCLNVSPSNAQWFYDHVKRGDIVEV . : 377
Ldt_mt1 213 : SVNSQGYANV . . . . . SHGCINLSPDNAAWYFDAVTVGDPIEV . : 249
Ldt_fm 426 : QPEYGGDLWKTRGSHGCINTPPSVMKELFGMVEKGT FVIV . : 465
Ldt_bs 131 : PA.SIGKAV . . . . . SKGCIRMHNKDVIELASIVPNGTRVTI . : 165
      ▲ ▲ ▲

```

### Supplementary Figure S5

Sequence alignment of L,D-transpeptidase domains in four YkuD family proteins. Sequence alignment of *M. tuberculosis* Ldt<sub>Mt2</sub> (Ldt\_mt2; SWISS-PROT accession code: O53223), *M. tuberculosis* Ldt<sub>Mt1</sub> (Ldt\_mt1; O53638), *Enterococcus faecium* Ldt<sub>fm</sub> (Ldt\_fm; Q3Y185), and *Bacillus subtilis* YkuD protein (Ldt<sub>Bs</sub>) (Ldt\_bs; O34816). The catalytic triad (His336, Ser337, and Cys354 in Ldt<sub>Mt2</sub>) and the active site lid (His300–Asp323 in Ldt<sub>Mt2</sub>) are enclosed by red and blue boxes, respectively. The residues forming the oxyanion hole (His352, Gly353 and Cys354 in Ldt<sub>Mt2</sub>) and tyrosines of Ldt<sub>Mt2</sub> (Tyr308 and Tyr318) that play important roles in the meropenem binding are indicated by blue triangles and orange circles below the sequences, respectively. This figure was drawn with ClustalX (Thompson *et al.*, 1997) and GeneDoc (<http://www.nrbsc.org/downloads>).

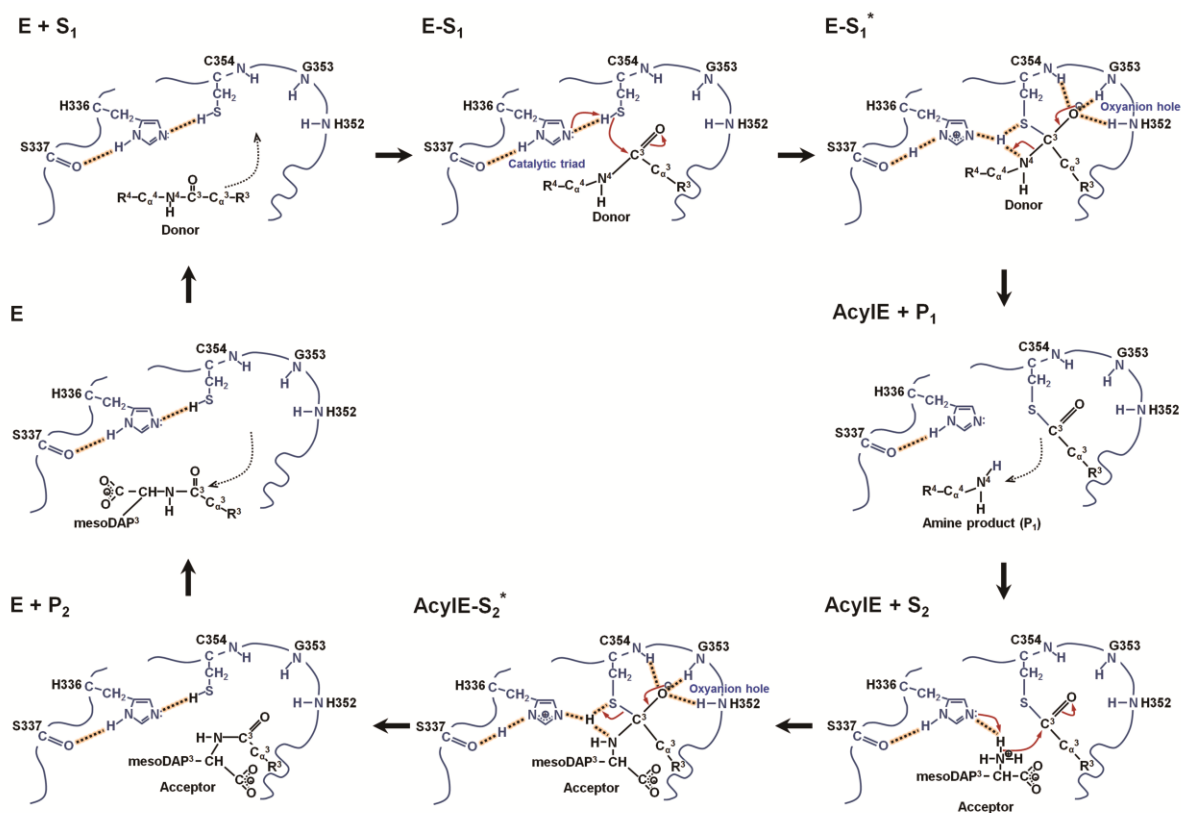

### Supplementary Figure S6

A mechanistic model for L,D-transpeptidation by Ldt<sub>M2</sub>. E, Ldt<sub>M2</sub> enzyme; S<sub>1</sub>, the donor substrate (meso-DAP<sup>3</sup>-D-Ala<sup>4</sup>); AcylE, the acylated Ldt<sub>M2</sub> by the S<sub>1</sub> adduct; P<sub>1</sub>, the leaving amine product from S<sub>1</sub> after acylation; S<sub>2</sub>, the acceptor substrate (meso-DAP<sup>3</sup>); P<sub>2</sub>, the final product from S<sub>2</sub> by 3→3 cross-linking after transpeptidation. Asterisks denote transition states.

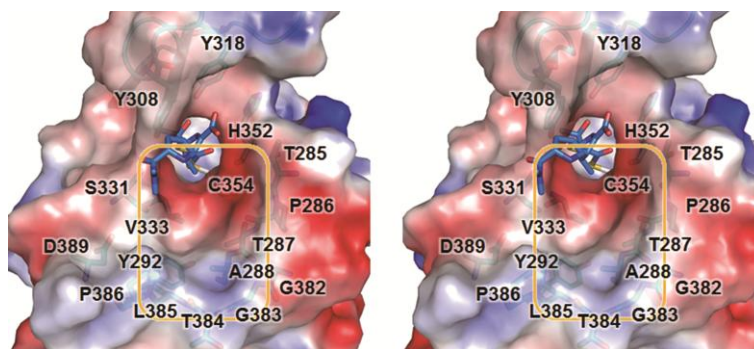

### Supplementary Figure S7

A stereo view of the electrostatic potential surface diagram around “Path B” of meropenem-complexed Ldt<sub>Mt2</sub>Δ<sub>130</sub>. The surface of the potential binding site for the donor substrate (S<sub>1</sub>) or the R<sup>3</sup> side chain of carbapenems is indicated by an orange box (for chain B). The bound meropenem is shown in a stick model.

**Supplementary Table S1. Mass analyses of Ldt<sub>Mt2Δ130</sub> before and after reacting with meropenem (masses in Da)**

|                               | Theoretical mass (A) | Experimental average mass (B) | Error (B–A) | Experimental meropenem mass <sup>a</sup> (C) | Theoretical mass of intact meropenem (D) | Error (D–C) |
|-------------------------------|----------------------|-------------------------------|-------------|----------------------------------------------|------------------------------------------|-------------|
| Apo                           | 31,246.80            | 31,263.80                     | +17.00      | -                                            | -                                        | -           |
| Complex (20 min) <sup>b</sup> | 31,630.26            | 31,648.63                     | +18.37      | 384.83                                       | 383.46                                   | -1.37       |
| Complex (3 days) <sup>c</sup> | 31,630.26            | 31,603.62                     | -26.64      | 339.82                                       | 383.46                                   | 43.64       |

<sup>a</sup> Experimental meropenem mass (experimental complex mass – experimental apo mass).

<sup>b</sup> Meropenem complex after 20 min reaction.

<sup>c</sup> Meropenem complex after 3 days of reaction.

**Supplementary Table S2. Root-mean-square deviations for pair-wise comparisons of Ldt<sub>Mt2Δ130</sub> models**

| Model               | Apo-form                | Mercury derivative      | Meropenem complex (chain A) |
|---------------------|-------------------------|-------------------------|-----------------------------|
| Mercury derivative  | 0.40 Å for 246 Cα atoms | -                       | -                           |
| Meropenem (chain A) | 0.67 Å for 246 Cα atoms | 1.34 Å for 263 Cα atoms | -                           |
| Meropenem (chain B) | 0.77 Å for 246 Cα atoms | 1.82 Å for 263 Cα atoms | 1.48 Å for 268 Cα atoms     |

## Supplemental Reference

Thompson, J. D., Gibson, T. J., Plewniak, F., Jeanmougin, F. & Higgins, D. G. (1997). *Nucleic Acids Res.* **25**, 4876–4882.
